# Supplementary material
Source: PubMed Central journal article supplement (PMC3623057)
Supplement: bph0168-1868-SD1.pdf [file bph0168-1868-SD1.pdf]

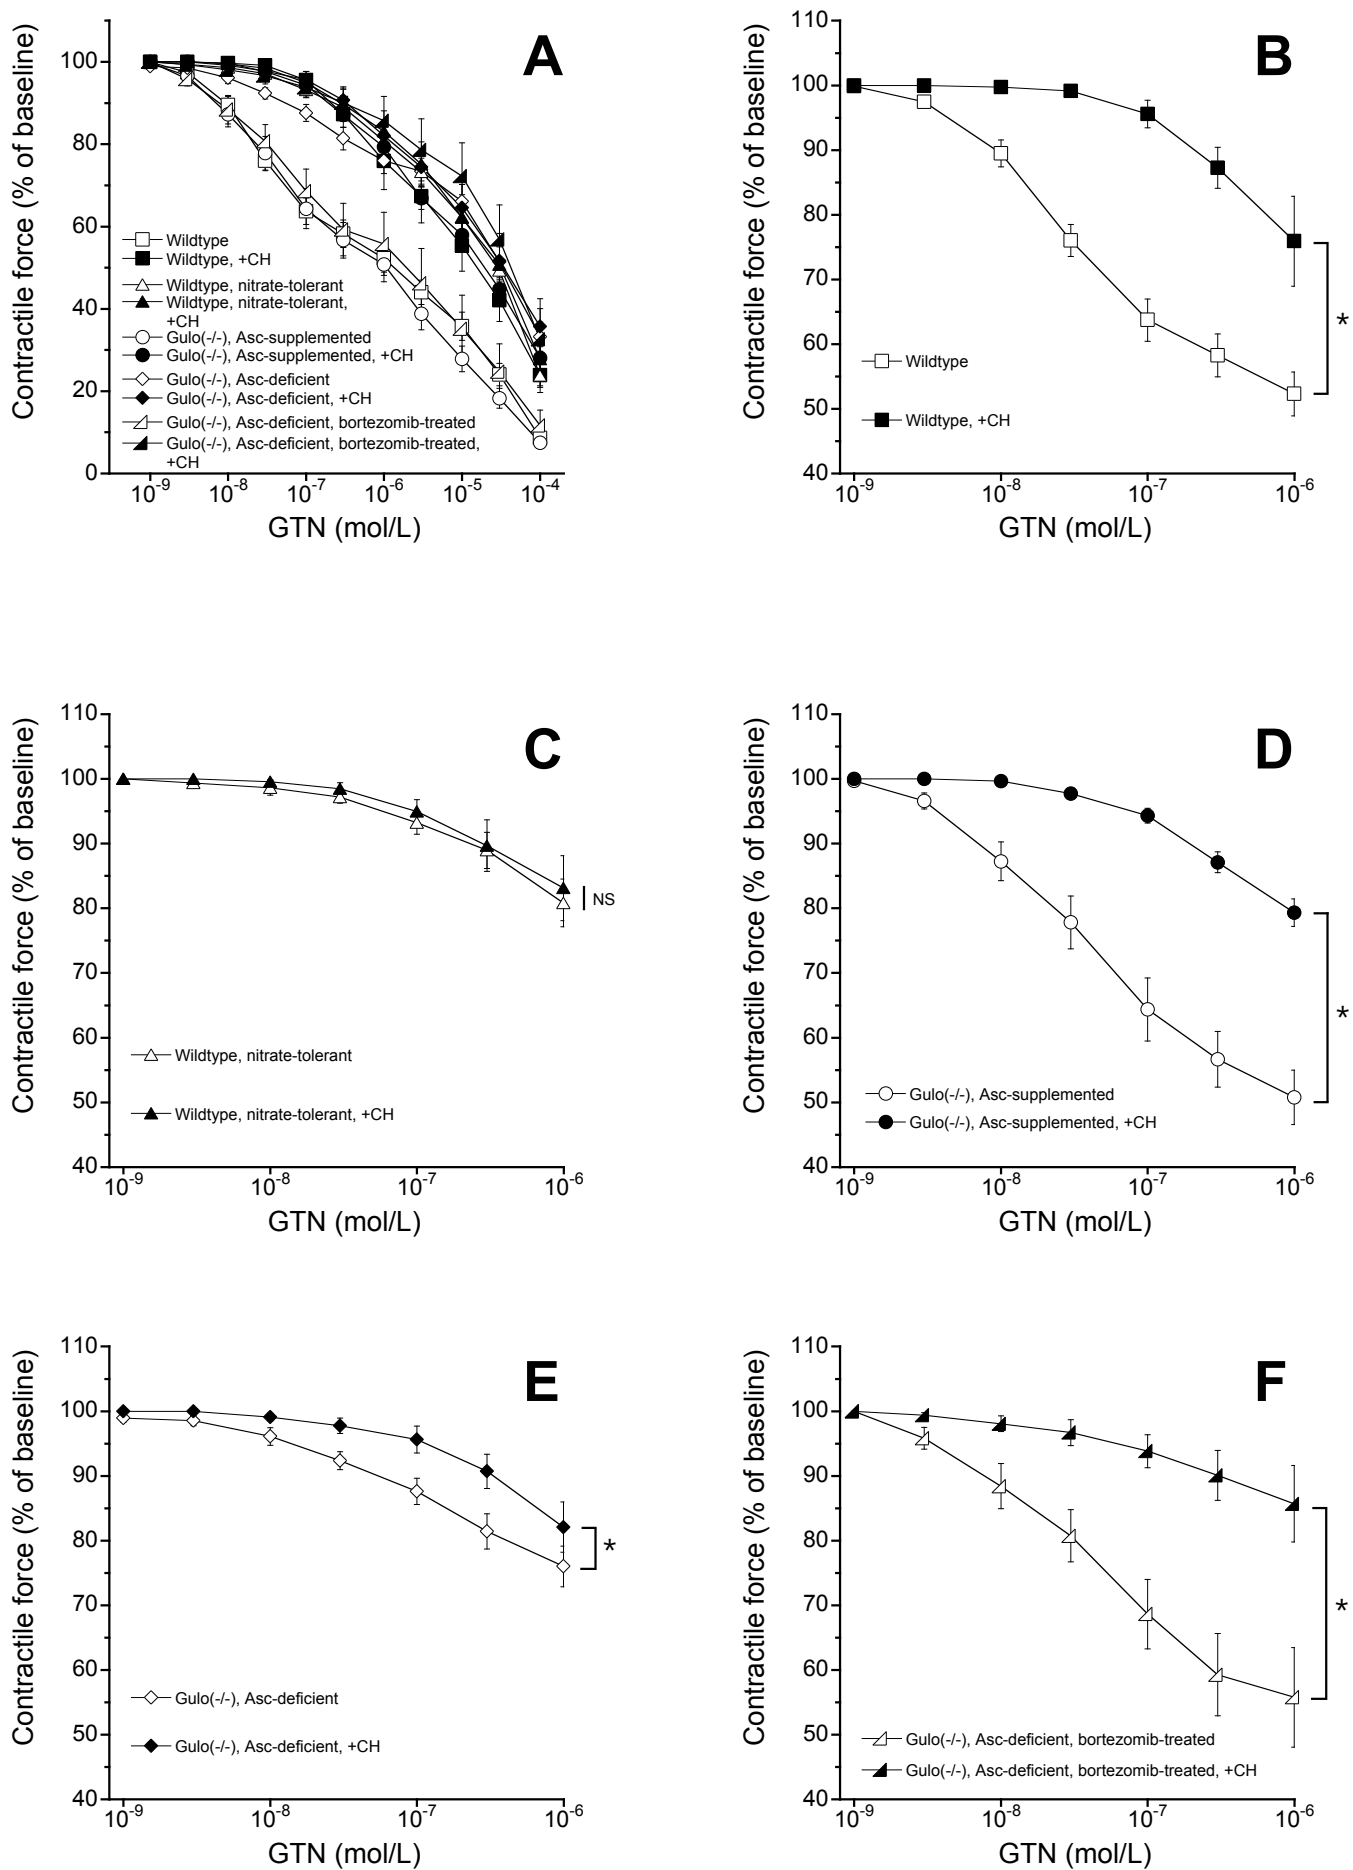

Figure S1

**Figure S1** Effect of chloral hydrate (CH, 5 mM, filled symbols) on the GTN concentration-response of aortic rings from untreated WT (squares), nitrate-tolerant WT (triangles), ascorbate-supplemented (circles), ascorbate-deficient (diamonds) and bortezomib-treated ascorbate-deficient (right-angled triangles) *Gulo*<sup>(-/-)</sup> mice (A). For clarity the high affinity pathway of the GTN response in the absence or presence of CH for each experimental group is illustrated separately in panels B-F (up to 1  $\mu$ M GTN). Aortic rings were incubated for 45 min with CH before the addition of GTN. Data are mean values  $\pm$  SEM of 9 (untreated WT, ascorbate-supplemented, ascorbate-deficient) or 5 (WT, nitrate-tolerant, bortezomib-treated ascorbate-deficient) animals. Concentration-response curves of different ring segments from a single animal were averaged and counted as individual experiment. \*P < 0.05. NS, non-significant

**Table S1** Aortic mRNA expression of NOX2, NOX4, and XO in wildtype (WT), ascorbate-supplemented (asc-suppl.) and ascorbate-deficient (asc-def.) Gulo<sup>(-/-)</sup> mice.

| Genotype                           | NOX2                   | NOX4      | XO        |
|------------------------------------|------------------------|-----------|-----------|
|                                    | $2^{-\Delta\Delta Ct}$ |           |           |
| WT                                 | 1.00±0.02              | 1.00±0.08 | 1.00±0.02 |
| Gulo <sup>(-/-)</sup> , asc-suppl. | 1.17±0.17              | 1.02±0.17 | 0.98±0.10 |
| Gulo <sup>(-/-)</sup> , asc-def.   | 1.35±0.22              | 0.85±0.23 | 0.92±0.30 |

Aortic mRNA expression was quantified by qPCR using TaqMan<sup>®</sup> Gene Expression Assays. Results were calculated according to the  $2^{-\Delta\Delta Ct}$  method and represent mean values ± SEM of 6 individual experiments performed in triplicate.
